# Supplementary material for: Dynamic assembly of a zinc-templated bifunctional organocatalyst in the presence of water for the asymmetric aldol reaction
Source: Royal Society of Chemistry journal article supplement (doi:10.1039/c5cc07847d), 2015-01-01
Supplement: c5cc07847d1.pdf [file c5cc07847d1.pdf]

## ELECTRONIC SUPPLEMENTARY INFORMATION

### Dynamic assembly of a zinc-templated bifunctional organocatalyst in the presence of water for the asymmetric aldol reaction.

Anna Serra-Pont, Ignacio Alfonso, Ciril Jimeno\* and Jordi Solà\*

---

*Institute of Advanced Chemistry of Catalonia (IQAC-CSIC), Department of Biological Chemistry and Molecular Modelling, c/Jordi Girona 18-26, E08034 Barcelona (Spain).*

*Email: [ciril.jimeno@iqac.csic.es](mailto:ciril.jimeno@iqac.csic.es), [Jordi.sola@iqac.csic.es](mailto:Jordi.sola@iqac.csic.es).*

|                                                                                                                                                                       |        |
|-----------------------------------------------------------------------------------------------------------------------------------------------------------------------|--------|
| 1) Synthesis of P ligands                                                                                                                                             | p. S2  |
| 2) Synthesis of T ligands                                                                                                                                             | p. S5  |
| 3) Typical procedure for the asymmetric aldol reaction                                                                                                                | p. S6  |
| 4) <sup>1</sup> H NMR and HPLC data of aldol products                                                                                                                 | p. S6  |
| 5) Effect of the zinc salt in the asymmetric aldol reaction                                                                                                           | p. S7  |
| 6) Effect of the solvent in the asymmetric aldol reaction                                                                                                             | p. S7  |
| 7) Effect of substituted pyridine and isoquinoline ligands in the asymmetric aldol reaction                                                                           | p. S8  |
| 8) Effect of the metal salt in the asymmetric aldol reaction                                                                                                          | p. S9  |
| 9) Reactions with variable amounts of zinc chloride and constant amounts of ligands                                                                                   | p. S9  |
| 10) UV/VIS spectra of ligands <b>T3</b> , <b>P3</b> , and mixtures ZnCl <sub>2</sub> - <b>T3</b> , ZnCl <sub>2</sub> - <b>P3</b> and ZnCl <sub>2</sub> - <b>T3-P3</b> | p. S10 |
| 11) <sup>1</sup> H NMR at variable temperature of the ZnCl <sub>2</sub> - <b>T3-P3</b> mixture                                                                        | p. S11 |
| 12) NMR titration of the ZnCl <sub>2</sub> - <b>P3:T3</b> mixture with <b>P3</b> ligand                                                                               | p. S13 |
| 13) References                                                                                                                                                        | p. S14 |

## 1) Synthesis of P ligands:

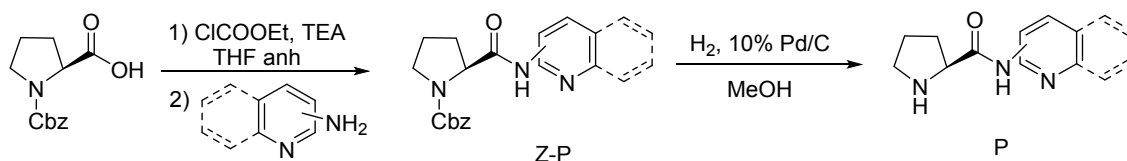

### Typical procedure for the synthesis of Z-P<sup>(1)</sup>

To a solution of the N-carbobenzyloxy-L-proline and TEA (1 g, 4 mmol) in dry THF (15 mL) under nitrogen atmosphere at 0°C was added ethylchloroformate (382  $\mu$ L, 4 mmol) dropwise and the reaction mixture was stirred for 30 min at 0 °C. After that, amine (4 mmol) was added and the resulting reaction was stirred at 0°C for 1 h and at 70°C for 24 hour. After cooled down to room temperature, the mixture was diluted with EtOAc (150 mL), filtered and the solvent was evaporated. The crude was purified by silica gel flash-column chromatography using a gradient of EtOAc in hexane to give Z-P.

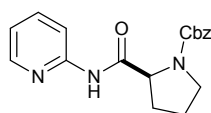

#### Benzyl (S)-2-(pyridin-2-ylcarbamoyl)pyrrolidine-1-carboxylate (Z-P2): Yield:

83% (yellow oil). <sup>1</sup>H NMR (400 MHz, CDCl<sub>3</sub>)  $\delta$  (ppm) 9.52 (bs, 1H), 8.25 (m, 2H), 7.72 (m, 1H), 7.40 (m, 3H), 7.08 (m, 3H), 5.15 (s, 2H), 4.45 (m, 1H), 3.57 (m, 2H), 2.21 (m, 2H), 1.95 (m, 2H). <sup>13</sup>C NMR (101 MHz, CDCl<sub>3</sub>)  $\delta$  (ppm) 176.1, 152.0, 147.0, 146.0, 138.6, 128.5, 128.2, 128.0, 128.0, 127.7, 127.6, 119.8, 114.8, 67.2, 61.5, 47.1, 31.2, 24.0. MS (ESI-TOF): 326.1471 (M+H)<sup>+</sup>, 348.1308 (M+Na)<sup>+</sup>, 673.2852 (2M+Na)<sup>+</sup>; calculated for C<sub>18</sub>H<sub>19</sub>N<sub>3</sub>O<sub>3</sub>: 326.1506 (M+H)<sup>+</sup>, 348.1326 (M+Na)<sup>+</sup>, 673.2752 (2M+Na)<sup>+</sup>.

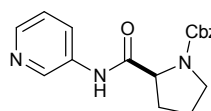

#### Benzyl (S)-2-(pyridin-3-ylcarbamoyl)pyrrolidine-1-carboxylate (Z-P3):

**Yield:** 70% (colourless oil). <sup>1</sup>H NMR (400 MHz, CDCl<sub>3</sub>)  $\delta$  (ppm) 9.50 (bs, 1H), 8.56 (bs, 1H), 8.26 (m, 1H), 8.02 (d, J = 8.2 Hz, 1H), 7.49 – 6.95 (m, 6H), 5.1 (m, 2H), 4.50 (m, 1H), 3.50 (m, 2H), 2.46 (m, 2H), 1.94 (m, 2H). <sup>13</sup>C NMR (101 MHz, CDCl<sub>3</sub>)  $\delta$  (ppm) 170.1, 156.9, 144.5, 140.8, 136.1, 135.1, 128.6, 128.3, 127.9, 127.3, 123.6, 67.8, 60.9, 47.2, 27.5, 24.6. MS (ESI-TOF): 326.1471 (M+H)<sup>+</sup>, 651.2960 (2M+H)<sup>+</sup>; calculated for C<sub>18</sub>H<sub>19</sub>N<sub>3</sub>O<sub>3</sub>: 326.1506 (M+H)<sup>+</sup>, 651.2932 (2M+H)<sup>+</sup>.

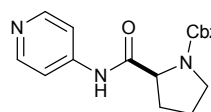

#### Benzyl (S)-2-(pyridin-4-ylcarbamoyl)pyrrolidine-1-carboxylate (Z-P4):

**Yield:** 64% (colourless oil). <sup>1</sup>H NMR (400 MHz, CDCl<sub>3</sub>)  $\delta$  (ppm) 9.72 (bs, 1H), 8.39 (d, J = 5.5 Hz, 2H), 7.36 (m, 7H), 5.24 (m, 2H), 4.50 (m, 1H), 3.46 (m, 2H), 2.43 (m, 2H), 2.03 – 1.83 (m, 2H). <sup>13</sup>C NMR (101 MHz, CDCl<sub>3</sub>)  $\delta$  (ppm) 170.3, 150.0, 145.4, 136.0, 128.6, 128.3, 127.9, 113.7, 67.9, 61.1, 47.2, 27.2, 24.6. MS (ESI-TOF): 326.1465 (M+H)<sup>+</sup>, 651.2927 (2M+H)<sup>+</sup>; calculated for C<sub>18</sub>H<sub>19</sub>N<sub>3</sub>O<sub>3</sub>: 326.1506 (M+H)<sup>+</sup>, 651.2932 (2M+H)<sup>+</sup>.

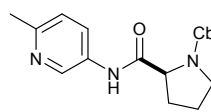

#### Benzyl (S)-2-((6-methylpyridin-3-yl)carbamoyl)pyrrolidine-1-carboxylate (Z-P5):

**Yield:** 84% (brown oil). <sup>1</sup>H NMR (400 MHz, CDCl<sub>3</sub>)  $\delta$  (ppm) 9.30 (bs, 1H), 8.46 (bs, 1H), 7.90 (m, 1H), 7.36 (m, 5H), 7.07 (d, J = 8.4 Hz, 1H), 5.20 (m, 2H), 4.51 (m, 1H), 3.68 – 3.36 (m, 2H), 2.50 (s, 3H), 1.94-2.16 (m, 4H). <sup>13</sup>C NMR (101 MHz, CDCl<sub>3</sub>)  $\delta$  (ppm) 169.9, 153.4, 140.1, 136.1, 132.6, 128.6, 128.3, 127.9, 127.6, 123.2, 67.7, 60.9,

47.2, 27.5, 24.6, 23.4. **MS (ESI-TOF):** 340.1533 (M+H)<sup>+</sup>, 679.3035 (2M+H)<sup>+</sup>; calculated for C<sub>19</sub>H<sub>21</sub>N<sub>3</sub>O<sub>3</sub>: 340.1663 (M+H)<sup>+</sup>, 679.3246 (2M+H)<sup>+</sup>.

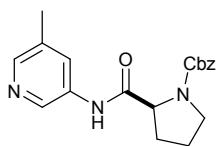

**Benzyl (S)-2-((5-methylpyridin-3-yl)carbamoyl)pyrrolidine-1-carboxylate (Z-P6):** Yield: 81% (brown oil). <sup>1</sup>H NMR (400 MHz, CDCl<sub>3</sub>) δ (ppm) 9.41 (bs, 1H), 8.37 (bs, 1H), 8.11 (bs, 1H), 7.86 (bs, 1H), 7.33 (m, 5H), 5.19 (m, 2H), 4.50 (m, 1H), 3.50 (m, 2H), 2.45 (m, 1H), 2.28 (s, 3H), 2.97 (m, 3H). <sup>13</sup>C NMR (101 MHz, CDCl<sub>3</sub>) δ (ppm) 170.1, 156.9, 144.9, 138.0, 136.1, 134.7, 133.6, 128.6, 128.3, 128.0, 127.7, 67.8, 60.9, 47.2, 27.5, 24.6, 18.3. **MS (ESI-TOF):** 340.1533 (M+H)<sup>+</sup>, 679.3061 (2M+H)<sup>+</sup>; calculated for C<sub>19</sub>H<sub>21</sub>N<sub>3</sub>O<sub>3</sub>: 340.1663 (M+H)<sup>+</sup>, 679.3246 (2M+H)<sup>+</sup>.

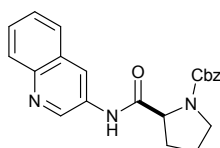

**Benzyl (S)-2-(quinolin-3-ylcarbamoyl)pyrrolidine-1-carboxylate (Z-P7):** Yield: 82% (yellow solid). <sup>1</sup>H NMR (400 MHz, CDCl<sub>3</sub>) δ (ppm) 9.77 (bs, 1H), 8.70 (m, 2H), 8.02 (d, J = 8.4 Hz, 1H), 7.75 (d, J = 7.3 Hz, 1H), 7.59 (m, 1H), 7.50 (m, 1H), 7.36 (m, 4H), 7.17 (m, 1H), 5.23 (m, 2H), 4.59 (m, 1H), 3.53 (m, 2H), 2.55-2.26 (m, 2H), 1.99 (m, 2H). <sup>13</sup>C NMR (101 MHz, CDCl<sub>3</sub>) δ (ppm) 170.2, 157.1, 143.8, 136.0, 128.8, 128.6, 128.3, 128.1, 128.0, 127.6, 127.2, 123.8, 67.9, 61.0, 47.2, 27.3, 24.7. **MS (ESI-TOF):** 376.1544 (M+H)<sup>+</sup>, 751.3065 (2M+H)<sup>+</sup>; calculated for C<sub>22</sub>H<sub>21</sub>N<sub>3</sub>O<sub>3</sub>: 376.1663 (M+H)<sup>+</sup>, 751.3246 (2M+H)<sup>+</sup>.

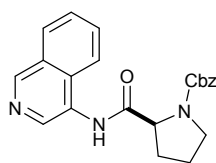

**Benzyl (S)-2-(isoquinolin-4-ylcarbamoyl)pyrrolidine-1-carboxylate (Z-P8):** Yield: 68% (brown oil). <sup>1</sup>H NMR (400 MHz, CDCl<sub>3</sub>) δ (ppm) 9.09 (bs, 1H), 8.50 (m, 1H), 8.09 (m, 2H), 7.87 (m, 2H), 7.65 (m, 2H), 7.30 (m, 4H), 5.15 (m, 2H), 4.61 (m, 1H), 3.62 (m, 2H), 2.55-2.26 (m, 2H), 1.99 (m, 2H). <sup>13</sup>C NMR (101 MHz, CDCl<sub>3</sub>) δ (ppm) 173.7, 149.9, 139.1, 131.0, 129.3, 128.1, 127.74, 127.69, 127.52, 127.47, 127.45, 124.17, 121.5, 121.2, 120.8, 67.1, 60.4, 47.2, 30.1, 23.4. **MS (ESI-TOF):** 376.1557 (M+H)<sup>+</sup>, 751.3105 (2M+H)<sup>+</sup>; calculated for C<sub>22</sub>H<sub>21</sub>N<sub>3</sub>O<sub>3</sub>: 376.1663 (M+H)<sup>+</sup>, 751.3246 (2M+H)<sup>+</sup>.

#### Typical procedure for the synthesis of P ligands

Compounds Z-P (2.58mmol) was dissolved in MeOH (20 mL) under nitrogen. After addition of 10 % Pd/C catalyst, the reaction mixture was stirred at rt for 24 h under hydrogen atmosphere. After this time, catalyst was removed by filtration through celite, and the solvent was evaporated. The crude product was purified by flash chromatography using AcOEt/MeOH mixtures with some drops of aqueous ammonia to give P.

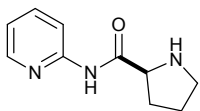

**(S)-N-(pyridin-2-yl)pyrrolidine-2-carboxamide (P2):** Yield: 54% (yellow oil). <sup>1</sup>H NMR (400 MHz, CDCl<sub>3</sub>) δ (ppm) 10.22 (bs, 1H), 8.24 (m, 2H), 7.68 (m, 1H), 7.01 (m, 1H), 3.93 (dd, J = 9.3, 5.2 Hz, 1H), 3.22 (bs, 1H), 3.06 (m, 2H), 2.22 (m, 1H), 2.03 (m, 1H), 1.77 (m, 2H). <sup>13</sup>C NMR (101 MHz, CDCl<sub>3</sub>) δ (ppm) 174.4, 151.1, 147.9, 138.2, 119.5, 113.5, 60.9, 47.3, 30.8, 26.2. **MS (ESI-TOF):** 192.1112 (M+H)<sup>+</sup>, 214.0954 (M+Na)<sup>+</sup>; calculated for C<sub>10</sub>H<sub>13</sub>N<sub>3</sub>O: 192.1139 (M+H)<sup>+</sup>, 214.1059 (M+Na)<sup>+</sup>. [α]<sub>D</sub><sup>20</sup> = -56.5 (c = 1.0, CH<sub>3</sub>OH).

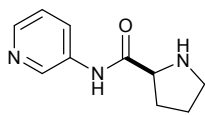

**(S)-N-(pyridin-3-yl)pyrrolidine-2-carboxamide (P3):** Yield: 90% (colourless oil).  $^1\text{H}$  NMR (400 MHz,  $\text{CDCl}_3$ )  $\delta$  (ppm) 9.85 (s, 1H), 8.58 (d,  $J = 2.6$ , 1H), 8.31 (dd,  $J = 4.8$ , 1.5 Hz, 1H), 8.24 (ddd,  $J = 8.3$ , 2.6, 1.5 Hz, 1H), 7.26 (m, 1H), 3.86 (dd,  $J = 9.3$ , 5.2 Hz, 1H), 3.08 (m, 1H), 2.98 (m, 1H), 2.21 (m, 1H), 2.02 (m, 1H), 1.86 (bs, 1H), 1.75 (m, 2H).  $^{13}\text{C}$  NMR (101 MHz,  $\text{CDCl}_3$ )  $\delta$  (ppm) 174.1, 144.9, 140.8, 134.5, 126.3, 123.6, 60.9, 47.3, 30.7, 26.3. **MS (ESI-TOF):** 192.1108 ( $\text{M}+\text{H}$ ) $^+$ , 214.0924 ( $\text{M}+\text{Na}$ ) $^+$ , 405.2014 ( $2\text{M}+\text{Na}$ ) $^+$ ; calculated for  $\text{C}_{10}\text{H}_{13}\text{N}_3\text{O}$ : 192.1139 ( $\text{M}+\text{H}$ ) $^+$ , 214.1059 ( $\text{M}+\text{Na}$ ) $^+$ , 405.2118 ( $2\text{M}+\text{Na}$ ) $^+$ .  $[\alpha]^{20}_{\text{D}} = -60.2$  ( $c = 1.0$ ,  $\text{CH}_3\text{OH}$ ).

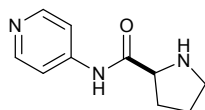

**(S)-N-(pyridin-4-yl)pyrrolidine-2-carboxamide (P4):** Yield: quant. (brown oil).  $^1\text{H}$  NMR (400 MHz,  $\text{CD}_3\text{OD}-d_4$ )  $\delta$  (ppm) 8.52 (m, 2H), 7.86 (m, 2H), 4.53 (m, 1H), 3.45 (m, 2H), 2.59 (m, 1H), 2.12 (m, 3H).  $^{13}\text{C}$  NMR (101 MHz,  $\text{CD}_3\text{OD}-d_4$ )  $\delta$  (ppm) 176.4, 150.8, 147.9, 115.1, 62.3, 48.0, 32.0, 27.1. **MS (ESI-TOF):** 192.1120 ( $\text{M}+\text{H}$ ) $^+$ ; calculated for  $\text{C}_{10}\text{H}_{13}\text{N}_3\text{O}$ : 192.1139 ( $\text{M}+\text{H}$ ) $^+$ .  $[\alpha]^{20}_{\text{D}} = -43.8$  ( $c = 1.0$ ,  $\text{CH}_3\text{OH}$ ).

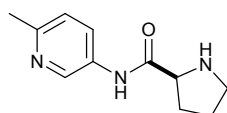

**(S)-N-(6-methylpyridin-3-yl)pyrrolidine-2-carboxamide (P5):** Yield: quant. (yellow oil).  $^1\text{H}$  NMR (400 MHz,  $\text{CDCl}_3$ )  $\delta$  (ppm) 9.77 (bs, 1H), 8.46 (d,  $J = 2.6$  Hz, 1H), 8.13 (dd,  $J = 8.4$ , 2.6 Hz, 1H), 7.11 (d,  $J = 8.4$  Hz, 1H), 3.86 (dd,  $J = 9.3$ , 5.2 Hz, 1H), 3.06 (m, 1H), 2.96 (m, 1H), 2.93 (bs, 1H), 2.50 (s, 3H), 2.02 (m, 1H), 1.92 (m, 1H), 1.76 (m, 2H).  $^{13}\text{C}$  NMR (101 MHz,  $\text{CDCl}_3$ )  $\delta$  (ppm) 173.6, 153.7, 140.2, 132.3, 127.4, 123.3, 61.0, 47.4, 30.8, 26.3, 23.8. **MS (ESI-TOF):** 206.1255 ( $\text{M}+\text{H}$ ) $^+$ , 228.1084 ( $\text{M}+\text{Na}$ ) $^+$ , 433.2311 ( $2\text{M}+\text{Na}$ ) $^+$ ; calculated for  $\text{C}_{11}\text{H}_{15}\text{N}_3\text{O}$ : 206.1295 ( $\text{M}+\text{H}$ ) $^+$ , 228.1115 ( $\text{M}+\text{Na}$ ) $^+$ , 433.233 ( $2\text{M}+\text{Na}$ ) $^+$ .  $[\alpha]^{20}_{\text{D}} = -45.6$  ( $c = 1.0$ ,  $\text{CH}_3\text{OH}$ ).

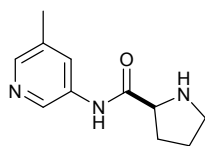

**(S)-N-(5-methylpyridin-3-yl)pyrrolidine-2-carboxamide (P6):** Yield: quant. (brown oil).  $^1\text{H}$  NMR (400 MHz,  $\text{CDCl}_3$ )  $\delta$  (ppm) 9.96 (bs, 1H), 8.41 (d,  $J = 2.3$  Hz, 1H), 8.13 (bs, 1H), 8.07 (bs, 1H), 3.97 (dd,  $J = 9.2$ , 5.3 Hz, 1H), 3.28 (bs, 1H), 3.12 (m, 2H), 3.02 (m, 2H), 2.30 (s, 3H), 2.23 (m, 1H), 2.04 (m, 1H), 1.79 (m, 2H).  $^{13}\text{C}$  NMR (101 MHz,  $\text{CDCl}_3$ )  $\delta$  (ppm) 174.1, 145.5, 138.2, 134.3, 133.6, 127.0, 61.0, 47.4, 30.8, 26.6, 18.7. **MS (ESI-TOF):** 206.1263 ( $\text{M}+\text{H}$ ) $^+$ , 228.1093 ( $\text{M}+\text{Na}$ ) $^+$ , 433.2310 ( $2\text{M}+\text{Na}$ ) $^+$ ; calculated for  $\text{C}_{11}\text{H}_{15}\text{N}_3\text{O}$ : 206.1295 ( $\text{M}+\text{H}$ ) $^+$ , 228.1115 ( $\text{M}+\text{Na}$ ) $^+$ , 433.2330 ( $2\text{M}+\text{Na}$ ) $^+$ .  $[\alpha]^{20}_{\text{D}} = -44.6$  ( $c = 1.0$ ,  $\text{CH}_3\text{OH}$ ).

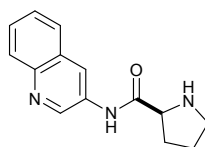

**(S)-N-(quinolin-3-yl)pyrrolidine-2-carboxamide (P7):** Yield: 71% (yellow oil).  $^1\text{H}$  NMR (400 MHz,  $\text{CDCl}_3$ )  $\delta$  (ppm) 10.10 (bs, 1H), 8.85 (d,  $J = 2.6$ , 1H), 8.78 (d,  $J = 2.6$  Hz, 1H), 8.03 (d,  $J = 8.4$  Hz, 1H), 7.80 (dd,  $J = 8.2$ , 1.5 Hz, 1H), 7.61 (ddd,  $J = 8.4$ , 6.9, 1.5 Hz, 1H), 7.52 (ddd,  $J = 8.2$ , 6.9, 1.3 Hz, 1H), 3.94 (dd,  $J = 9.3$ , 5.2 Hz, 1H), 3.13 (m, 1H), 3.05 (m, 1H), 2.25 (m, 2H), 1.87 (bs, 1H), 1.80 (m, 2H).  $^{13}\text{C}$  NMR (101 MHz,  $\text{CDCl}_3$ )  $\delta$  (ppm) 174.5, 145.2, 144.1, 131.5, 129.1, 128.4, 128.2, 127.9, 127.3, 123.1, 61.2, 47.3, 30.9, 26.5. **MS (ESI-TOF):** 242.1258 ( $\text{M}+\text{H}$ ) $^+$ ; calculated for  $\text{C}_{14}\text{H}_{15}\text{N}_3\text{O}$ : 242.1295 ( $\text{M}+\text{H}$ ) $^+$ .  $[\alpha]^{20}_{\text{D}} = -85.9$  ( $c = 1.0$ ,  $\text{CH}_3\text{OH}$ ).

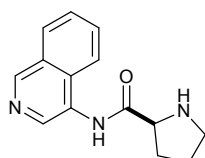

**(S)-N-(isoquinolin-4-yl)pyrrolidine-2-carboxamide (P8):** Yield: 42% (brown oil).  $^1\text{H}$  NMR (400 MHz,  $\text{CDCl}_3$ )  $\delta$  (ppm) 10.42 (bs, 1H), 9.24 (s, 1H), 9.05 (d,  $J = 0.8$  Hz, 1H), 7.98 (m, 1H), 7.83 (dd,  $J = 8.5$ , 1.0 Hz, 1H), 7.73 (ddd,  $J = 8.4$ , 6.8, 1.3 Hz, 1H), 7.61 (ddd,  $J = 8.0$ , 6.8, 1.1 Hz, 1H), 4.02 (dd,  $J = 9.3$ , 5.1 Hz,

1H), 3.14 (m, 2H), 2.25 (m, 2H), 2.10 (bs, 1H) 1.82 (m, 2H). **<sup>13</sup>C NMR** (101 MHz CDCl<sub>3</sub>) δ (ppm) 173.8, 148.9, 136.1, 130.6, 129.1, 128.7, 128.3, 128.0, 127.3, 119.9, 61.5, 47.7, 31.0, 26.7. **MS (ESI-TOF):** 242.1282 (M+H)<sup>+</sup>, 483.2436 (2M+H)<sup>+</sup>; calculated for C<sub>14</sub>H<sub>15</sub>N<sub>3</sub>O: 242.1295 (M+H)<sup>+</sup>, 483.2510 (2M+H)<sup>+</sup>. [α]<sub>D</sub><sup>20</sup> = -24.4 (c = 0.5, CH<sub>3</sub>OH)

## 2) Synthesis of T ligands:

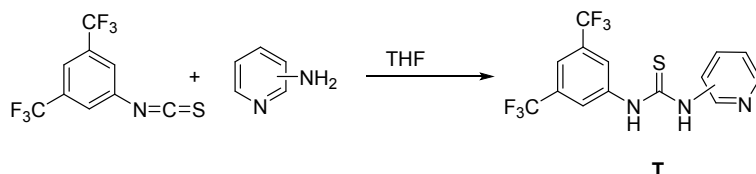

To a solution of amine (10.6 mmol) in dry THF (19 mL) under nitrogen atmosphere at 0°C was added 3,5-Bis(trifluoromethyl)phenyl Isothiocyanate (2 mL, 10.6 mmol) and the mixture was stirred overnight at room temperature. The solvent was evaporated and the crude was purified by silica gel flash-column chromatography using a gradient of EtOAc in hexane to give **T**.

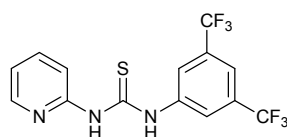

### **1-(3,5-bis(trifluoromethyl)phenyl)-3-(pyridin-2-yl)thiourea (T2):**

**Yield:** 95% (white solid). **<sup>1</sup>H NMR** (400 MHz, CDCl<sub>3</sub>) δ (ppm) 14.21 (bs, 1H), 9.31 (bs, 1H), 8.29 (dd, *J* = 5.1, 1.9, 1H), 8.26 (bs, 2H), 7.78 – 7.70 (m, 2H), 7.08 (ddd, *J* = 7.4, 5.2, 0.9 Hz, 1H), 6.96 (d, *J* = 8.3 Hz, 1H). **<sup>13</sup>C NMR** (101 MHz CDCl<sub>3</sub>) δ (ppm) 179.2, 152.8, 145.7, 140.1, 139.5, 132.1 (q, *J* = 33.3 Hz), 124.5 (bq), 124.4, 121.7, 119.3 (m), 118.9, 112.5. **MS (ESI-TOF):** 366.0485 (M+H)<sup>+</sup>; calculated for C<sub>14</sub>H<sub>9</sub>F<sub>6</sub>N<sub>3</sub>S: 366.0501 (M+H)<sup>+</sup>.

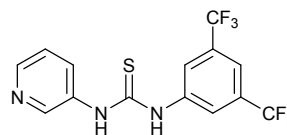

### **1-(3,5-bis(trifluoromethyl)phenyl)-3-(pyridin-3-yl)thiourea (T3):**

**Yield:** 90% (white solid). **<sup>1</sup>H NMR** (400 MHz, CD<sub>3</sub>OD-*d*<sub>4</sub>) δ (ppm) 8.66 (dd, *J* = 2.6, 0.7 Hz, 1H), 8.37 (dd, *J* = 4.9, 1.5 Hz, 1H), 8.24 (bs, 2H), 8.09 (ddd, *J* = 8.3, 2.6, 1.5 Hz, 1H), 7.72 (bs, 1H), 7.47 (dd, *J* = 8.3, 4.9, 1H). **<sup>13</sup>C NMR** (101 MHz, CD<sub>3</sub>OD-*d*<sub>4</sub>) δ (ppm) 182.9, 146.6, 146.3, 142.8, 137.8, 134.1, 132.6 (q, *J* = 33.3 Hz), 126.0, 125.0, 124.8, 123.3 (bq), 118.6 (m). **MS (ESI-TOF):** 366.0468 (M+H)<sup>+</sup>; calculated for C<sub>14</sub>H<sub>9</sub>F<sub>6</sub>N<sub>3</sub>S: 366.0501 (M+H)<sup>+</sup>.

### 3) Typical procedure for the asymmetric aldol reaction.

A mixture of  $\text{ZnCl}_2$  (10 mg, 0.074 mmol, 20 mol %), P (0.074 mmol, 20 mol %) and T (0.074 mmol, 20 mol %) was stirred in dry THF (528  $\mu\text{L}$ ) and  $\text{H}_2\text{O}$  (20  $\mu\text{L}$ , 1.1 mmol) at room temperature for 1 h and at  $-20^\circ\text{C}$  for 30 min. Then, the aldehyde (0.37 mmol) and cyclohexanone (3.7 mmol) were added. The resulting mixture was stirred at  $-20^\circ\text{C}$  for 24-48 h. The product was extracted with ethyl acetate and the organic phase was washed with water, dried over anhydrous  $\text{MgSO}_4$  and filtered, and the solvent was removed in *vacuo*. The crude product was purified by flash chromatography eluting with hexane:ethyl acetate mixtures of increasing polarity.

### 4) $^1\text{H}$ NMR and HPLC data of aldol products.<sup>2</sup>

All the aldol products except 4-hydroxy-4-(4-nitrophenyl)butan-2-one (shown below) are described and characterized in ref. 2.

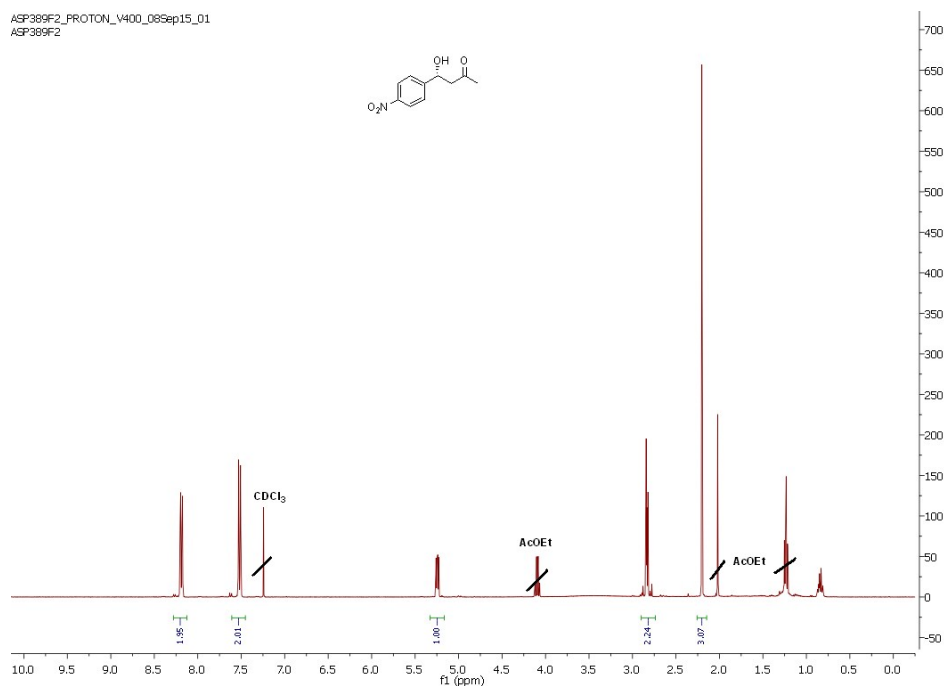

HPLC: ID column, 1 ml/min, 10% *iso*-propanol, 209 nm.

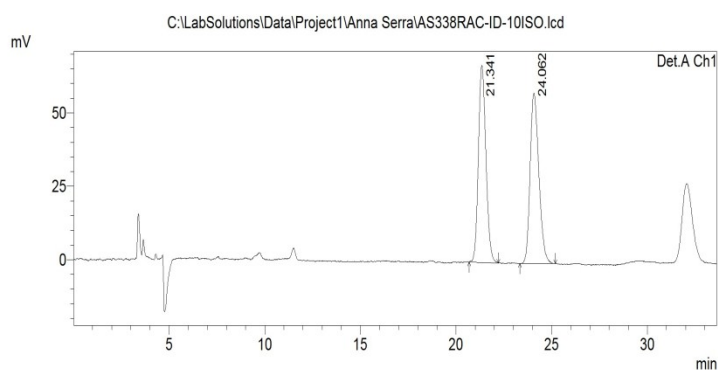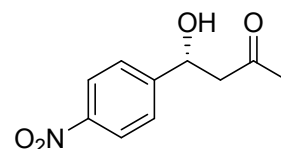

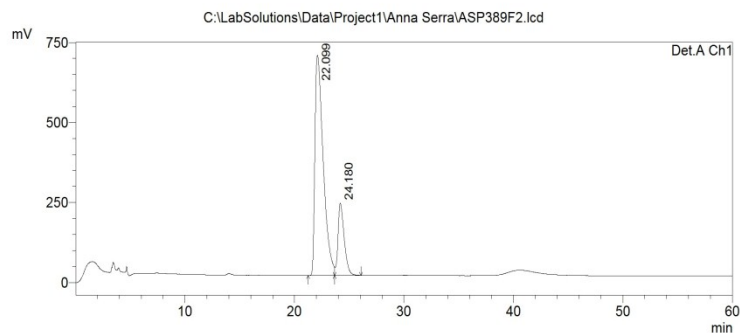

### 5) Effect of the zinc salt in the asymmetric aldol reaction:

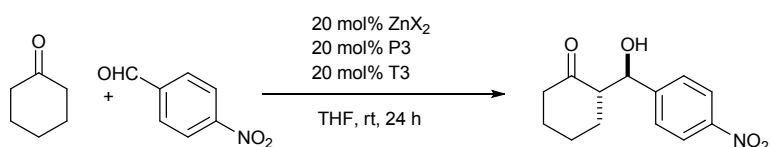

| <b>ZnX<sub>2</sub></b>                                | <b>Solvent</b>              | <b>Conversion/%</b> | <b>dr anti/syn</b> | <b>ee/%</b> |
|-------------------------------------------------------|-----------------------------|---------------------|--------------------|-------------|
| Zn(OAc) <sub>2</sub> ·2H <sub>2</sub> O               | THF anhyd. + 3 equiv. water | 89                  | 71/29              | 67          |
|                                                       | THF anhyd.                  | 91                  | 75/25              | 47          |
| ZnCl <sub>2</sub>                                     | THF anhyd. + 3 equiv. water | 99                  | 87/13              | 79          |
|                                                       | THF anhyd.                  | 97                  | 84/16              | 14          |
| ZnBr <sub>2</sub>                                     | THF anhyd. + 3 equiv. water | 100                 | 85/15              | 59          |
| ZnI <sub>2</sub>                                      | THF anhyd. + 3 equiv. water | 89                  | 83/17              | 62          |
| Zn(OTf) <sub>2</sub>                                  | THF anhyd. + 3 equiv. water | 45                  | 68/32              | 73          |
| Zn(ClO <sub>4</sub> ) <sub>2</sub> ·6H <sub>2</sub> O | THF anhyd. + 3 equiv. water | 60                  | 72/28              | 79          |
|                                                       | THF anhyd.                  | 60                  | 48/52              | 42          |

Best results in terms of ee were obtained with ZnCl<sub>2</sub> and Zn(ClO<sub>4</sub>)<sub>2</sub>. However conversion and diastereoselectivity were clearly superior with ZnCl<sub>2</sub>.

### 6) Effect of the solvent in the asymmetric aldol reaction:

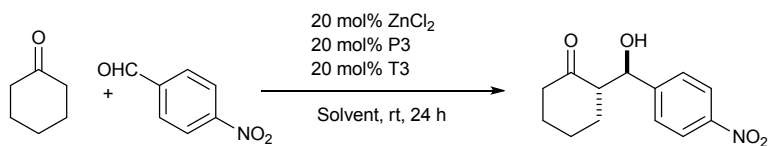

| <b>Solvent</b>                        | <b>Conversion/%</b> | <b>dr anti/syn</b> | <b>ee/%</b> |
|---------------------------------------|---------------------|--------------------|-------------|
| THF anhyd. + 3 equiv. water           | <b>99</b>           | <b>87/13</b>       | <b>79</b>   |
| THF anhyd.                            | 97                  | 84/16              | 14          |
| DCM + 3 eq. water                     | 65                  | 81/19              | 70          |
| DCM anhyd.                            | 72                  | 85/15              | 34          |
| Toluene + 3 eq. water                 | 98                  | 80/20              | 61          |
| 2-methyltetrahydrofuran + 3 eq. water | 97                  | 83/17              | 67          |

|                                 |     |       |    |
|---------------------------------|-----|-------|----|
| DME + 3 eq. water               | 89  | 84/16 | 60 |
| EtOH + 3 eq. water              | 76  | 81/19 | 44 |
| Et <sub>2</sub> O + 3 eq. water | 93  | 83/17 | 69 |
| tBuOH + 3 eq. water             | 98  | 84/16 | 59 |
| AcOEt + 3 eq. water             | 91  | 85/15 | 64 |
| DMF + 3 eq. water               | 100 | 83/17 | 52 |
| Dioxane + 3 eq. water           | 100 | 86/14 | 57 |
| Tetrahydropyran + 3 eq. water   | 100 | 82/18 | 65 |
| ACN + 3 eq. water               | 88  | 87/13 | 57 |

**7) Effect of substituted pyridine, quinoline and isoquinoline ligands in the asymmetric aldol reaction:**

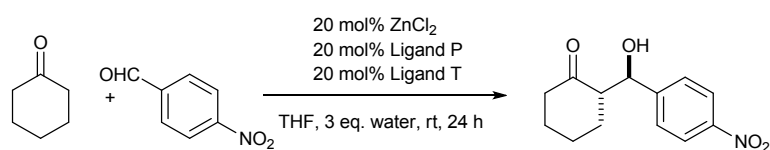

| <b><i>P + T3</i></b> |  | <b><i>Conversion/%</i></b> | <b><i>dr<br/>anti/syn</i></b> | <b><i>ee/%</i></b> |
|----------------------|--|----------------------------|-------------------------------|--------------------|
|                      |  | 98                         | 83/17                         | 62                 |
|                      |  | 98                         | 84/16                         | 62                 |
|                      |  | 98                         | 83/17                         | 66                 |
|                      |  | 83                         | 83/17                         | 60                 |



## 8) Effect of the metal salt in the asymmetric aldol reaction:

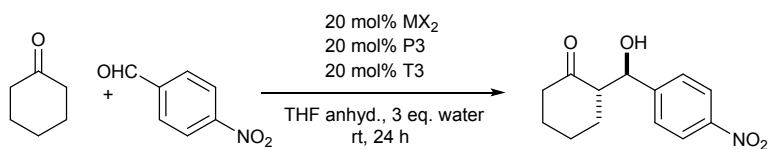

| $\text{MX}_2$                             | Conversion/% | <i>dr anti/syn</i> | <i>ee</i> /% |
|-------------------------------------------|--------------|--------------------|--------------|
| $\text{CdCl}_2$                           | 38           | 75/25              | 61           |
| $\text{CuCl}_2 \cdot 2\text{H}_2\text{O}$ | 17           | 95/5               | 98           |
| $\text{CaCl}_2$                           | 59           | 70/30              | 68           |
| $\text{NiCl}_2 \cdot 6\text{H}_2\text{O}$ | 3            | 76/24              | nd           |

## 9) Reactions with variable amounts of zinc chloride and constant amounts of ligands:

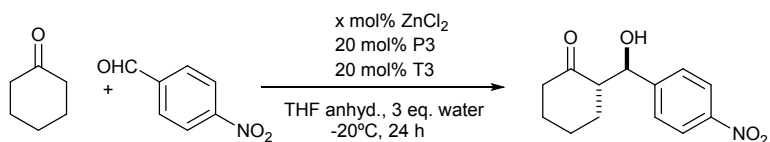

| <i>mol %</i> $\text{ZnCl}_2$ | Conversion/% | <i>dr anti/syn</i> | <i>ee</i> /% |
|------------------------------|--------------|--------------------|--------------|
| 1                            | 33           | 94/6               | 92           |
| 5                            | 41           | 94/6               | 90           |
| 10                           | 57           | 95/5               | 89           |
| 20                           | 81           | 95/5               | 92           |
| 25                           | 84           | 95/5               | 93           |

# 10) UV/VIS spectra of ligands T3, P3, and mixtures ZnCl<sub>2</sub>-T3, ZnCl<sub>2</sub>-P3 and ZnCl<sub>2</sub>-T3-P3.

All solutions were prepared at 24  $\mu$ M in THF (spectroscopic grade) and 1.5 % (v/v) water.

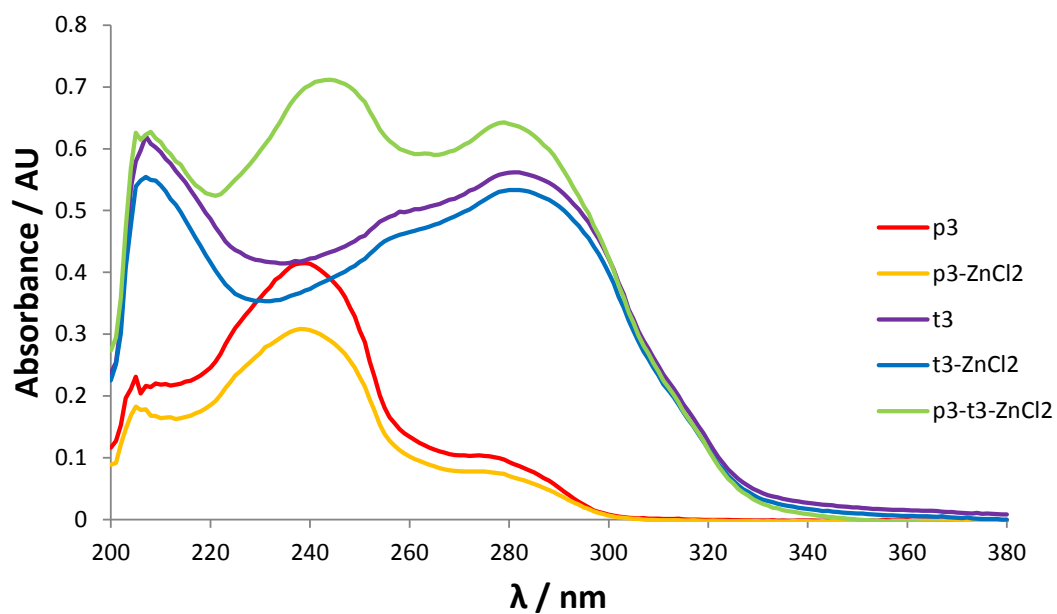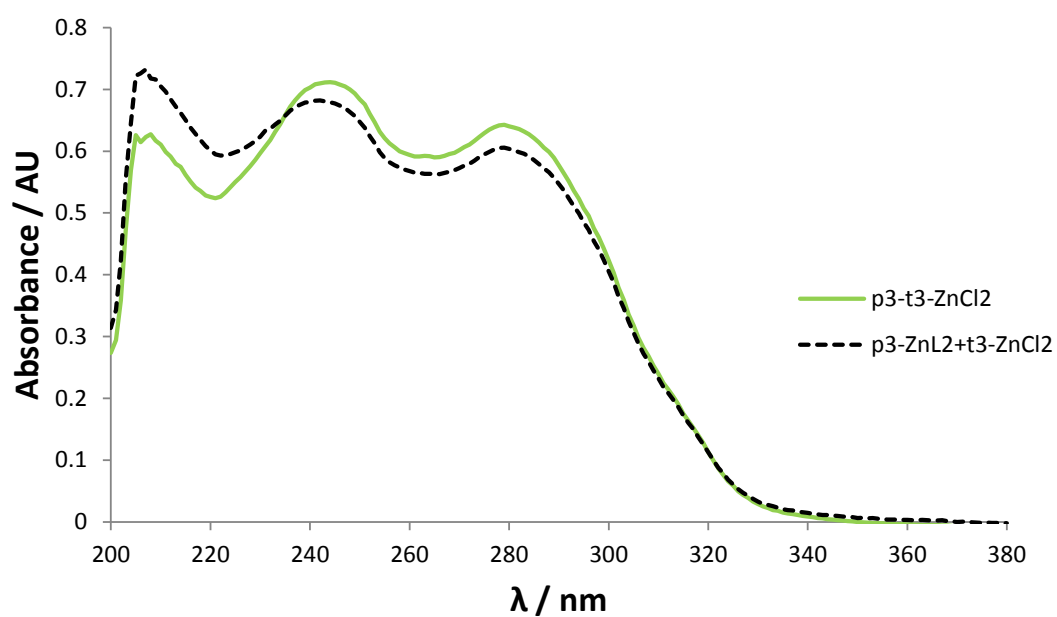

## **11) $^1\text{H}$ NMR at variable temperature of the $\text{ZnCl}_2$ -T3-P3 mixture.**

Spectra recorded in a Varian 500 MHz spectrometer at -7, 0, 10, 20 and 30 °C (from top to down) in  $\text{THF-d}_8$ + 1.5% (v/v)  $\text{H}_2\text{O}$ . Reference was set to TMS according to ref. 3.

### **A) Full scale spectra:**

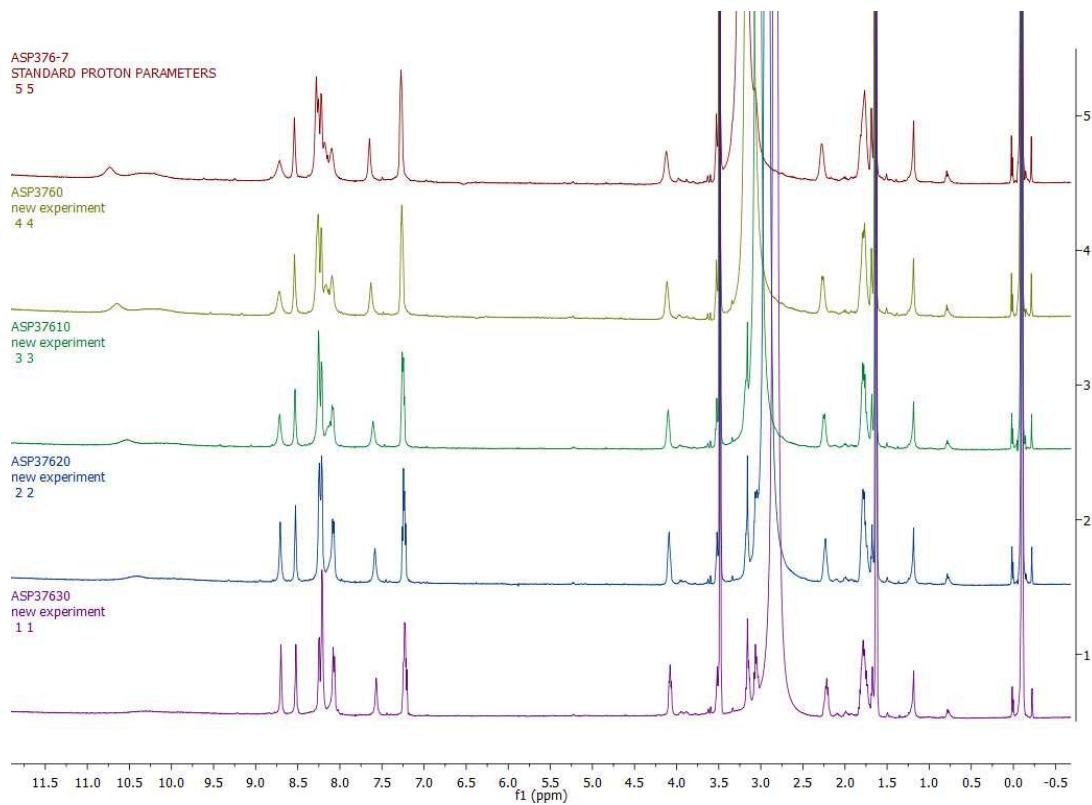

B) 6.7 – 11.2 ppm EXPANSION (PYRIDINE, AROMATIC, AND H-BONDING REGION):  
Changes in the 8.0-8.4 ppm region can be appreciated. Broad, separated signals at -7 °C coalesce and get defined upon heating. Indication of the presence of several species in fast exchange.

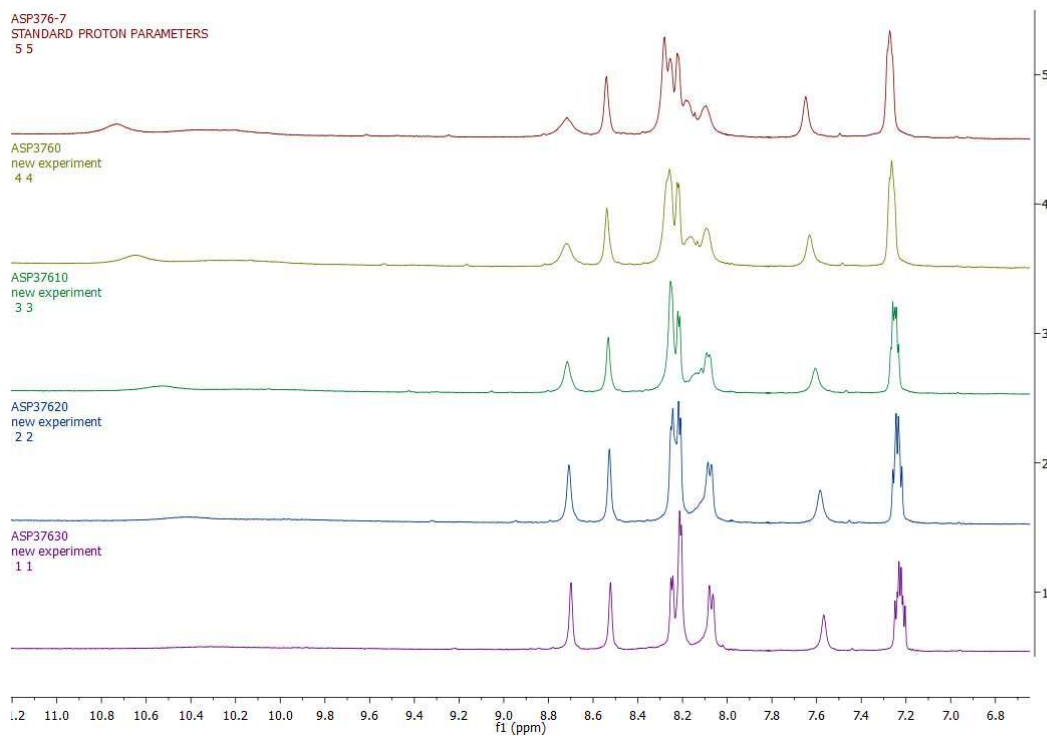

C) 0.4 – 4.6 ppm EXPANSION (PROLINAMIDE REGION): No changes observed.

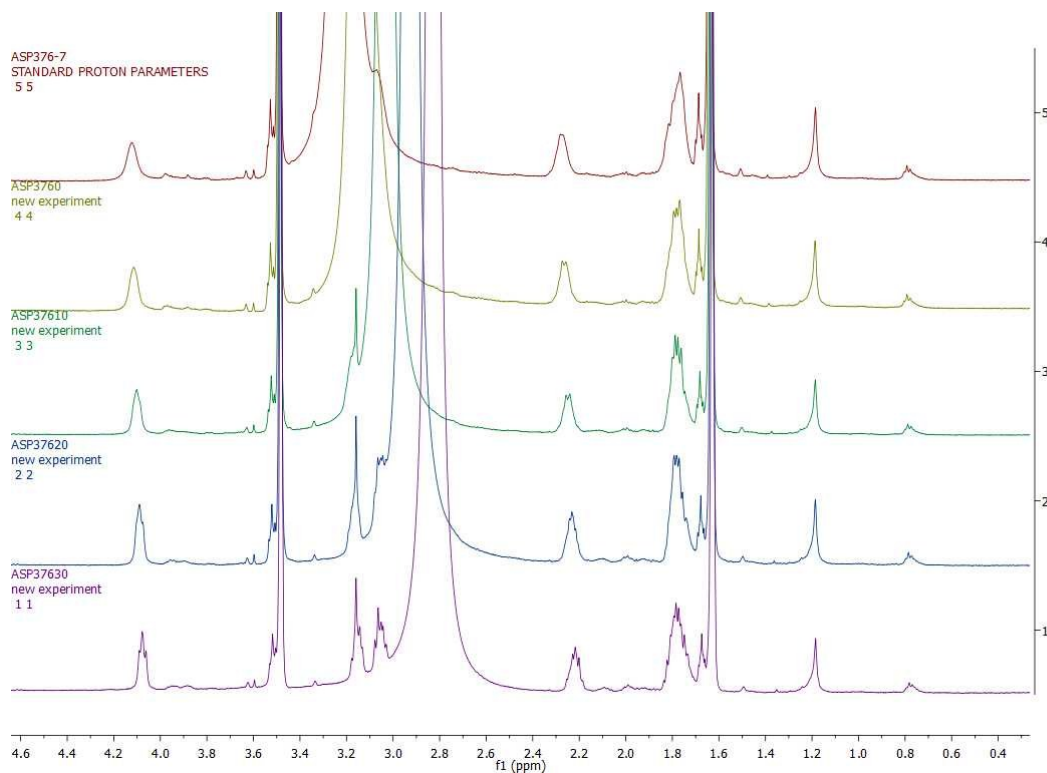

## 12) NMR TITRATION OF THE $\text{ZnCl}_2\text{:P3:T3}$ MIXTURE WITH P3 LIGAND:

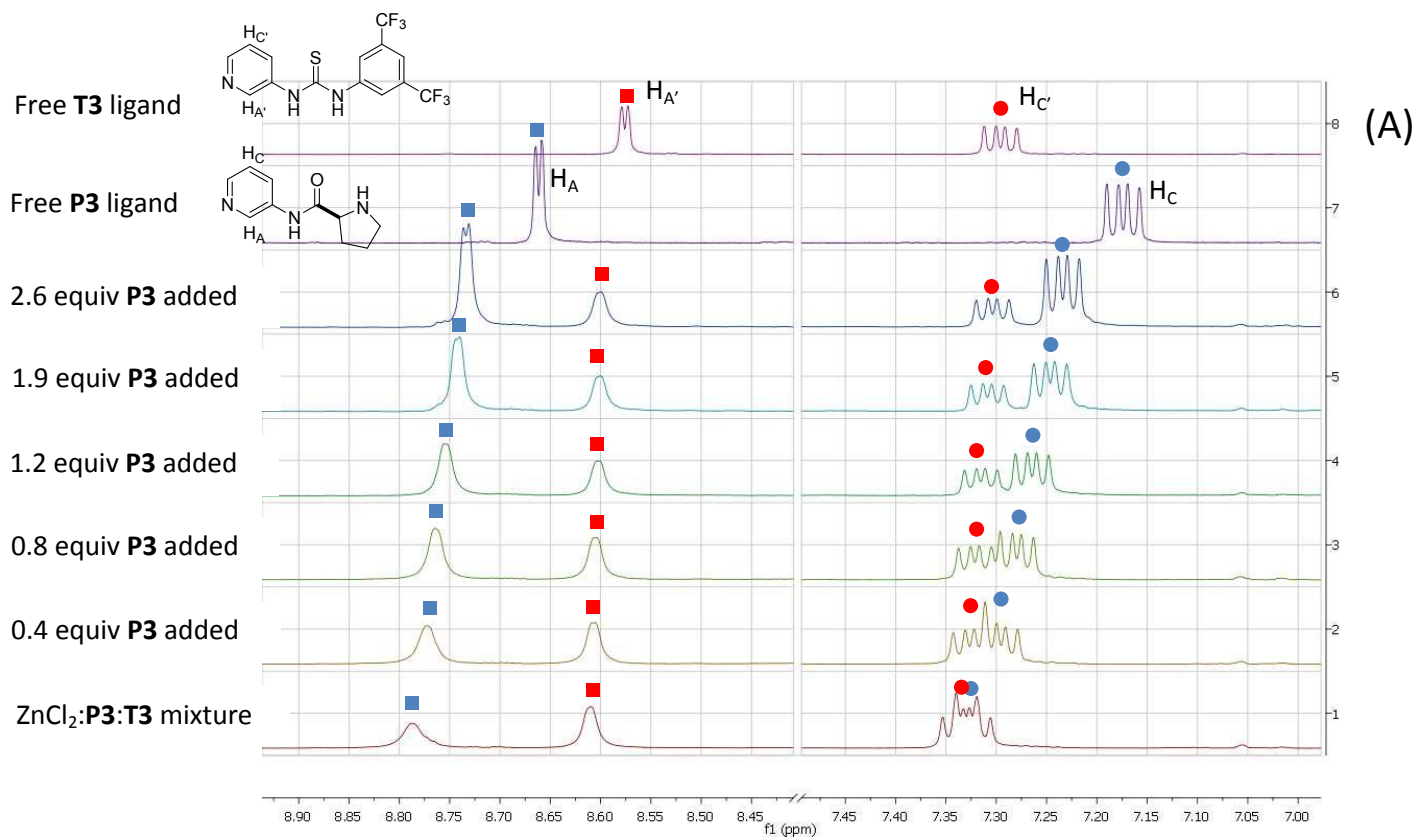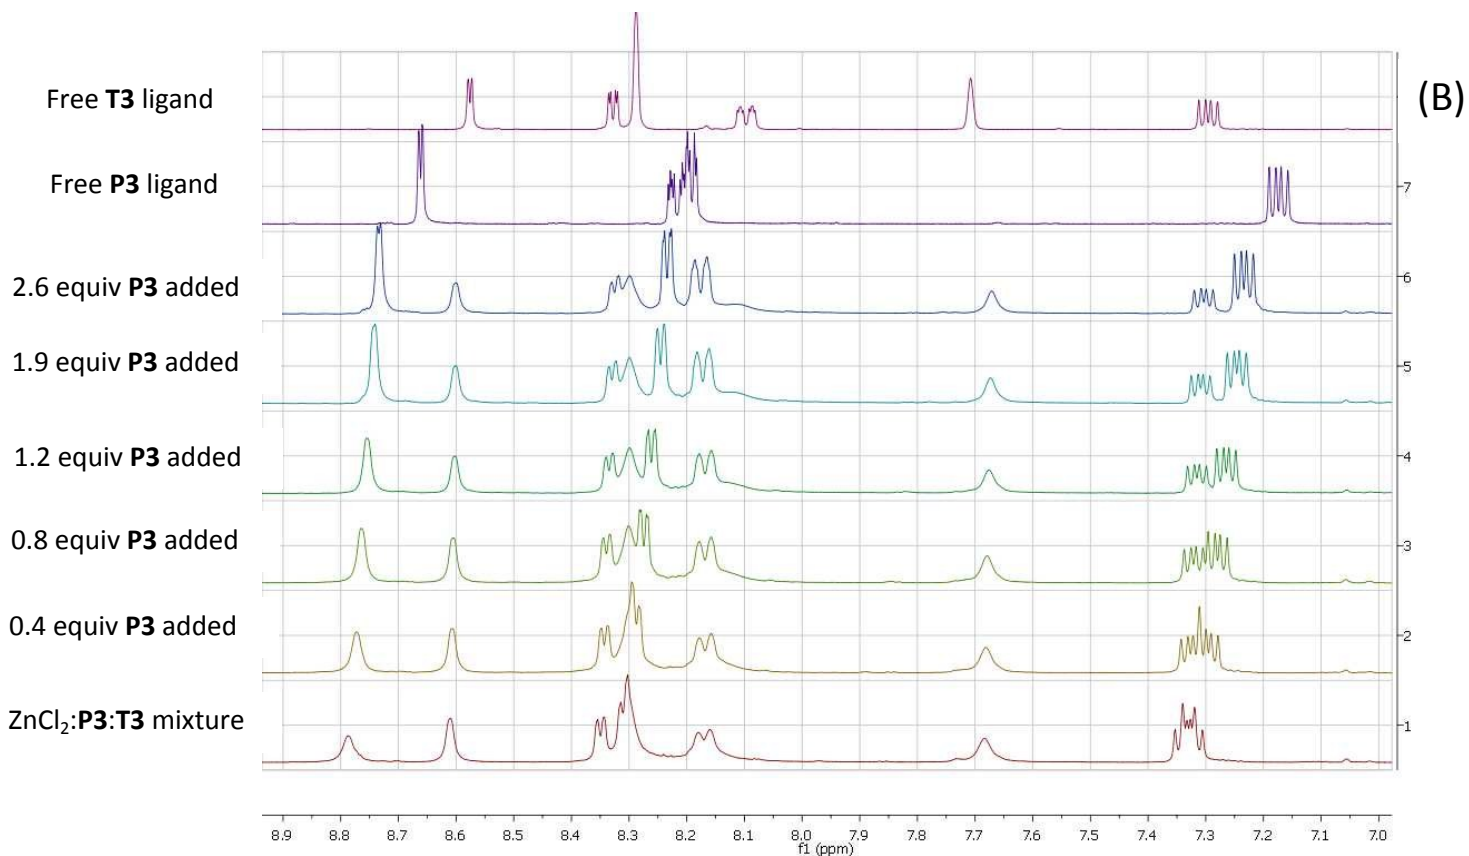

Experiments were performed in a Varian 400 spectrometer in THF-d8 plus 20  $\mu$ l of water. Above, the aromatic region (B) and the expanded region corresponding to clearly assigned signals (A) are shown.

Signals corresponding to ligand **P3** (blue) increase in intensity and shift upfield upon addition of more **P3**, approaching the chemical shift and shape of the free ligand. Signals corresponding to ligand **T3** (red) also shift towards the free ligand value, although less markedly. No signals corresponding to free ligand (either **P3** or **T3**) or to a particular zinc complex appear. Therefore free ligands and complexes are in fast exchange, and only average signals can be recorded by  $^1\text{H}$  NMR.

## **12) References.**

- (1) Zhuo Tang , Lin-Feng Cun , Xin Cui , Ai-QiaoMi , Yao-Zhong Jiang , and Liu-Zhu Gong . *Org.Lett.*, 2006, **8**, 1263–1266.
- (2) A. M. Valdivielso, A. Catot, I. Alfonso and C. Jimeno, *RSC Adv.*, 2015, **5**, 62331-62335.
- (3) R. E. Hoffman, *Magn. Res. Chem.* 2006, **44**, 606-616.
